# Supplementary material for: Essential Oil Yield, Composition, and Bioactivity of Sagebrush Species in the Bighorn Mountains
Source: MDPI journal article supplement (doi:10.3390/plants11091228), 2022-05-01
Supplement: s1 [file s1]

---

Article

# Essential Oil Yield, Composition, and Bioactivity of Sagebrush Species in the Bighorn Mountains

Valtcho D. Zheljazkov <sup>1,\*</sup>, Charles L. Cantrell <sup>2</sup>, Ekaterina A. Jeliaskova <sup>1</sup>, Tess Astatkie <sup>3</sup>, and Vicki Schlegel <sup>4</sup>

<sup>1</sup> Crop and Soil Science Department, 3050 SW Campus Way, Oregon State University, Corvallis, OR 97331, USA

<sup>2</sup> Natural Products Utilization Research, USDA-Agricultural Research Service, University of Mississippi, University, MS 38677, USA; charles.cantrell@usda.gov

<sup>3</sup> Faculty of Agriculture, Dalhousie University, Truro, NS B2N 5E3, Canada; astatie@dal.ca

<sup>4</sup> University of Nebraska–Lincoln, Department of Food Science and Technology, Department of Food Science and Technology, 326 Food Technology Complex, Lincoln, NE 68583, USA; vschlegel3@unl.edu

\* Correspondence: valtcho.jeliaskov@oregonstate.edu

## Supplemental tables

**Table S1.** Mean (using n = 3) content (%) of constituents in essential oil obtained by steam distillation of *A. tridentata* Nutt. var. *vaseyana* (Rydb.) Boivin accessions biomass collected from Bighorn Mountains in Wyoming.

| Constituent                                          | RT(mins) | Accessions  |             |      |              |      |      |              |              |              |              |              |              |
|------------------------------------------------------|----------|-------------|-------------|------|--------------|------|------|--------------|--------------|--------------|--------------|--------------|--------------|
|                                                      |          | #201        | #202        | #203 | #204         | #205 | #206 | #207         | #209         | #210         | #211         | #212         | #214         |
| 1-Heptene                                            | 2.55     | -           | -           | -    | 0.63         | -    | -    | -            | -            | -            | -            | -            | -            |
| 1-Octene                                             | 4.76     | -           | -           | -    | 0.21         | -    | -    | 0.04         | -            | -            | -            | -            | -            |
| Hexanal                                              | 4.96     | -           | 0.03        | -    | -            | -    | -    | -            | -            | -            | -            | -            | -            |
| Ethyl isovalerate/Hexanol                            | 6.92     | -           | -           | -    | 0.02         | -    | -    | -            | -            | -            | -            | -            | -            |
| <b>1-Nonene</b>                                      | 8.30     | -           | -           | -    | <b>2.48</b>  | -    | -    | -            | -            | -            | -            | -            | -            |
| 2-Acetylfuran                                        | 8.69     | -           | -           | -    | -            | -    | -    | 0.09         | -            | -            | -            | -            | -            |
| <b>Santolina triene</b>                              | 8.92     | 0.10*       | 0.33        | -    | -            | -    | -    | <b>2.51</b>  | -            | 0.40         | 0.18         | 0.24         | 2.46         |
| Tricyclene                                           | 9.49     | 0.33        | 0.31        | -    | -            | -    | -    | 0.42         | -            | -            | 0.65         | 0.64         | -            |
| Alpha-thujene                                        | 9.69     | -           | -           | -    | 0.19         | -    | -    | 0.08         | -            | 0.14         | -            | -            | -            |
| <b>Alpha-pinene</b>                                  | 9.96     | <b>2.98</b> | <b>2.92</b> | 0.94 | <b>2.94</b>  | 0.04 | -    | <b>1.62</b>  | <b>29.0</b>  | <b>35.5</b>  | <b>5.27</b>  | <b>5.65</b>  | <b>1.34</b>  |
| <b>Camphene</b>                                      | 10.54    | <b>6.55</b> | <b>6.75</b> | 0.11 | -            | 0.21 | -    | <b>8.37</b>  | <b>2.89</b>  | <b>2.2</b>   | <b>13.76</b> | <b>13.58</b> | <b>6.55</b>  |
| Thuja-2,4(10)-diene                                  | 10.70    | -           | -           | -    | -            | -    | -    | -            | 0.25         | -            | -            | -            | -            |
| 4,4-Dimethyl-2-butenolide/Thuja-2,4(10)-diene        | 10.79    | -           | -           | -    | -            | -    | -    | 0.05         | -            | -            | -            | -            | -            |
| Isobutyl butyrate                                    | 10.81    | -           | -           | -    | 0.22         | -    | -    | -            | -            | -            | -            | -            | -            |
| <b>Sabinene</b>                                      | 11.54    | 0.24        | 0.17        | 0.03 | <b>12.32</b> | -    | -    | 0.36         | 0.42         | 0.42         | 0.77         | 0.59         | -            |
| Arthole / Beta-pinene                                | 11.68    | -           | 0.67        | -    | -            | -    | -    | -            | -            | -            | -            | -            | -            |
| <b>Arthole</b>                                       | 11.71    | -           | -           | -    | -            | -    | -    | <b>6.91</b>  | -            | -            | -            | -            | <b>12.97</b> |
| <b>Beta-pinene</b>                                   | 11.72    | 0.45        | -           | -    | 7.23         | -    | -    | -            | <b>1.93</b>  | <b>2.68</b>  | <b>2.34</b>  | <b>1.72</b>  | -            |
| Dehydro-1,8-cineole                                  | 12.21    | -           | -           | -    | -            | -    | -    | 0.24         | 0.33         | 0.27         | 0.25         | 0.21         | -            |
| 1,6-Dimethylhepta-1,3,5-triene                       | 12.25    | 0.41        | -           | 0.2  | -            | 0.16 | 0.11 | -            | -            | -            | -            | -            | 0.56         |
| Dehydro-1,8-cineole / 1,6-dimethylhepta-1,3,5-triene | 12.26    | -           | 0.40        | -    | -            | -    | -    | -            | -            | -            | -            | -            | -            |
| Mesitylene                                           | 12.32    | 0.09        | -           | -    | -            | -    | -    | 0.06         | -            | -            | -            | -            | -            |
| <b>Myrcene</b>                                       | 12.36    | -           | -           | -    | <b>7.46</b>  | -    | -    | -            | -            | -            | -            | -            | -            |
| Delta-3-carene                                       | 12.44    | -           | 0.03        | -    | -            | -    | -    | -            | -            | -            | -            | -            | -            |
| Butyl butanoate                                      | 12.45    | -           | -           | -    | 0.12         | -    | -    | -            | -            | -            | -            | -            | -            |
| Yomogi alcohol                                       | 12.54    | 0.09        | 0.09        | 0.10 | -            | 0.13 | 0.20 | 0.08         | 0.22         | -            | -            | -            | 0.17         |
| <b>Alpha-phellendrene</b>                            | 12.76    | -           | -           | -    | <b>16.86</b> | -    | -    | 0.11         | -            | -            | -            | -            | -            |
| Ortho-methylanisole                                  | 13.05    | -           | -           | -    | 0.06         | -    | -    | -            | -            | -            | -            | -            | -            |
| Hexyl acetate                                        | 13.09    | 0.04        | -           | -    | -            | -    | -    | -            | -            | -            | -            | -            | -            |
| Alpha-terpinene                                      | 13.23    | 0.07        | 0.08        | -    | 0.46         | -    | -    | 0.24         | 0.37         | 0.41         | 0.31         | 0.21         | -            |
| 1,2,4-Trimethyl benzene                              | 13.46    | 0.06        | -           | -    | -            | -    | -    | -            | -            | -            | -            | -            | -            |
| <b>Para-cymene</b>                                   | 13.52    | 0.12        | 0.09        | 0.06 | <b>31.83</b> | -    | -    | 0.54         | 0.54         | 0.53         | 0.47         | 0.51         | 0.37         |
| <b>Limonene</b>                                      | 13.71    | 0.19        | 0.31        | 0.04 | <b>3.30</b>  | 0.18 | -    | -            | -            | -            | -            | -            | -            |
| <b>Eucalyptol</b>                                    | 13.81    | <b>1.23</b> | <b>2.35</b> | 0.75 | -            | 0.20 | -    | <b>14.81</b> | <b>12.27</b> | <b>12.82</b> | <b>17.94</b> | <b>14.14</b> | <b>9.72</b>  |
| Cis-ocimene                                          | 14.13    | -           | -           | -    | 0.10         | -    | -    | -            | -            | -            | -            | -            | -            |
| Sorbyl acetate                                       | 14.15    | 0.10        | 0.08        | 0.09 | -            | 0.09 | 0.05 | -            | -            | -            | -            | -            | -            |

**Table S1 Continued.** Mean (using n = 3) content (%) of constituents in essential oil obtained by steam distillation of *A. tridentata* Nutt. var. *vaseyana* (Rydb.) Boivin accessions biomass collected from Bighorn Mountains in Wyoming.

| Constituent                          | RT(mins) | Accessions   |              |             |      |             |             |              |              |              |              |              |              |
|--------------------------------------|----------|--------------|--------------|-------------|------|-------------|-------------|--------------|--------------|--------------|--------------|--------------|--------------|
|                                      |          | #201         | #202         | #203        | #204 | #205        | #206        | #207         | #209         | #210         | #211         | #212         | #214         |
| <b>Trans-ocimene</b>                 | 14.55    | -            | -            | -           | 0.94 | -           | -           | -            | <b>3.05</b>  | <b>2.30</b>  | -            | -            | -            |
| Cis-arbusculone                      | 14.63    | -            | 0.04         | -           | -    | -           | -           | 0.08         | -            | -            | -            | -            | 0.18         |
| Santolina epoxide                    | 14.70    | -            | -            | -           | -    | -           | -           | 0.29         | -            | -            | -            | -            | -            |
| Pentyl isobutanoate                  | 14.90    | -            | -            | -           | 0.16 | -           | -           | -            | -            | -            | -            | -            | -            |
| Isoterpinolene / Isoterpinene        | 14.91    | 0.13         | 0.18         | -           | -    | -           | -           | -            | -            | -            | -            | -            | -            |
| <b>Gamma-terpinene</b>               | 14.92    | -            | -            | -           | -    | -           | -           | <b>1.34</b>  | 0.72         | <b>1.01</b>  | 0.67         | 0.51         | <b>1.02</b>  |
| Isopentyl butanoate/ Gamma-terpinene | 14.97    | -            | -            | -           | 0.87 | -           | -           | -            | -            | -            | -            | -            | -            |
| Bergamal                             | 15.01    | -            | -            | -           | -    | -           | -           | -            | -            | -            | -            | -            | -            |
| Cis-sabinene hydrate                 | 15.26    | -            | -            | -           | -    | -           | -           | -            | 0.19         | 0.30         | -            | -            | 0.22         |
| <b>Trans-arbusculone</b>             | 15.44    | -            | 0.06         | -           | -    | -           | -           | -            | <b>2.00</b>  | <b>1.71</b>  | -            | -            | 0.89         |
| Artemisia alcohol                    | 15.87    | -            | -            | -           | -    | -           | -           | -            | 0.16         | -            | -            | -            | 0.20         |
| Terpinolene                          | 16.06    | -            | -            | -           | 0.50 | -           | -           | 0.20         | 0.24         | 0.26         | 0.15         | 0.08         | -            |
| 2,6-xylenol / Alpha-pinene oxide     | 16.43    | -            | -            | -           | -    | -           | -           | -            | -            | -            | -            | -            | -            |
| Alpha pinene oxide / 2,6-Xylenol     | 16.43    | -            | -            | -           | -    | -           | -           | 0.13         | -            | -            | -            | -            | -            |
| Linalool / Ipsenol                   | 16.49    | -            | -            | -           | 0.22 | -           | -           | -            | -            | -            | -            | -            | -            |
| Nonanal                              | 16.63    | -            | -            | -           | 0.16 | -           | -           | -            | -            | -            | -            | -            | 0.24         |
| <b>Cis-thujone</b>                   | 16.71    | 0.39         | 0.16         | 0.09        | 0.05 | -           | -           | -            | -            | -            | <b>4.26</b>  | <b>7.50</b>  | -            |
| 2,6-xylenol / Benzyl ethanol         | 16.90    | 0.12         | 0.06         | -           | -    | -           | -           | -            | -            | -            | -            | -            | -            |
| Trans-thujone                        | 17.10    | -            | -            | -           | 0.05 | -           | -           | -            | -            | -            | 0.35         | 0.57         | -            |
| <b>Chrysanthenone</b>                | 17.23    | <b>17.97</b> | <b>1.21</b>  | -           | -    | -           | -           | <b>11.86</b> | <b>1.54</b>  | 0.39         | <b>2.29</b>  | <b>1.37</b>  | 0.17         |
| Methyl octanoate                     | 17.39    | -            | -            | -           | 0.14 | -           | -           | -            | -            | -            | -            | -            | -            |
| Alpha-campholenal                    | 17.50    | -            | -            | -           | 0.04 | -           | -           | -            | -            | -            | -            | -            | 0.40         |
| Cis-para-mentha-2,8-dien-1-ol        | 17.72    | -            | -            | -           | -    | -           | -           | -            | -            | -            | 0.17         | 0.24         | -            |
| 1-terpineol                          | 17.79    | -            | 0.10         | -           | -    | -           | -           | -            | -            | -            | -            | -            | -            |
| <b>Trans-pinocarveol</b>             | 18.00    | -            | <b>5.79</b>  | 0.08        | 0.06 | -           | -           | -            | <b>24.82</b> | <b>20.94</b> | -            | -            | 0.24         |
| <b>Camphor</b>                       | 18.21    | <b>24.91</b> | <b>23.43</b> | 0.28        | -    | 0.43        | -           | <b>29.32</b> | <b>1.76</b>  | 0.58         | <b>44.85</b> | <b>45.37</b> | <b>13.51</b> |
| <b>Alpha-santoline alcohol</b>       | 18.28    | -            | -            | -           | -    | -           | -           | <b>9.72</b>  | -            | -            | -            | -            | <b>3.71</b>  |
| Isobutyl hexanoate                   | 18.36    | -            | -            | -           | 0.19 | -           | -           | -            | -            | -            | -            | -            | -            |
| <b>Trans-chrysanthemol</b>           | 18.85    | <b>3.83</b>  | <b>3.67</b>  | <b>2.52</b> | -    | <b>3.96</b> | <b>4.48</b> | -            | -            | -            | -            | -            | -            |
| <b>Chrysanthemyl alcohol</b>         | 18.91    | -            | -            | -           | -    | -           | -           | 0.76         | -            | -            | -            | -            | 11.37        |
| <b>Pinocarvone</b>                   | 18.91    | -            | 0.83         | 0.25        | -    | -           | -           | 0.62         | <b>5.33</b>  | <b>6.90</b>  | <b>1.03</b>  | <b>1.24</b>  | <b>8.07</b>  |
| <b>Borneol / lavandulol</b>          | 19.05    | <b>1.35</b>  | <b>1.11</b>  | -           | -    | 0.22        | -           | -            | -            | -            | <b>1.85</b>  | <b>1.93</b>  | -            |
| <b>Borneol</b>                       | 19.10    | -            | -            | -           | -    | -           | -           | <b>2.03</b>  | 0.44         | 0.28         | -            | -            | <b>1.55</b>  |
| Atremisyl acetate                    | 19.21    | -            | -            | -           | -    | -           | -           | -            | -            | -            | -            | -            | -            |
| (3E,5Z)-1.3.5-undecatriene           | 19.24    | -            | -            | -           | 0.24 | -           | -           | -            | -            | -            | -            | -            | -            |
| Artemisyl acetate                    | 19.31    | -            | -            | -           | -    | -           | -           | -            | <b>2.88</b>  | -            | -            | -            | -            |
| Hexyl butanoate                      | 19.88    | -            | -            | -           | 0.24 | -           | -           | -            | -            | -            | -            | -            | -            |
| Alpha-terpineol                      | 19.98    | -            | -            | -           | -    | -           | -           | -            | -            | -            | 0.25         | 0.10         | -            |
| Myrtenal / Methyl chavicol           | 20.15    | -            | -            | -           | 0.24 | -           | -           | -            | -            | -            | -            | -            | -            |

**Table S1 Continued.** Mean (using n = 3) content (%) of constituents in essential oil obtained by steam distillation of *A. tridentata* Nutt. var. *vaseyana* (Rydb.) Boivin accessions biomass collected from Bighorn Mountains in Wyoming.

| Constituent                                                        | RT(mins) | Accessions   |              |              |             |              |              |      |             |             |      |      |             |
|--------------------------------------------------------------------|----------|--------------|--------------|--------------|-------------|--------------|--------------|------|-------------|-------------|------|------|-------------|
|                                                                    |          | #201         | #202         | #203         | #204        | #205         | #206         | #207 | #209        | #210        | #211 | #212 | #214        |
| Myrtenal / Myrtenol                                                | 20.19    | -            | -            | -            | -           | -            | -            | -    | -           | -           | -    | -    | 0.80        |
| Cis-dihydrocarvone/Myrtenol/Myrtenal                               | 20.20    | -            | -            | -            | -           | -            | -            | 0.61 | -           | -           | -    | -    | -           |
| Myrtenal                                                           | 20.21    | -            | -            | -            | -           | -            | -            | -    | -           | -           | 0.71 | 0.66 | -           |
| <b>Myrtenol</b>                                                    | 20.23    | -            | -            | -            | -           | -            | -            | -    | <b>1.22</b> | <b>1.24</b> | -    | -    | -           |
| Decanal                                                            | 20.37    | -            | -            | -            | 0.30        | -            | -            | -    | -           | -           | -    | -    | -           |
| Bornyl acetate                                                     | 20.39    | -            | -            | -            | -           | -            | -            | 0.49 | -           | -           | 0.44 | 0.39 | 0.33        |
| <b>Fragranol</b>                                                   | 21.01    | <b>7.48</b>  | <b>12.37</b> | <b>20.29</b> | -           | <b>14.88</b> | <b>15.00</b> | -    | -           | -           | -    | -    | -           |
| <b>Trans-ethyl-chrysanthemumate / Trans-alpha-necrodol-acetate</b> | 23.33    | <b>10.24</b> | <b>13.48</b> | <b>25.91</b> | -           | <b>34.78</b> | <b>45.15</b> | -    | -           | -           | -    | -    | <b>8.17</b> |
| Isobornyl acetate                                                  | 23.61    | -            | -            | 0.59         | -           | -            | -            | -    | -           | -           | -    | -    | -           |
| Lavandulyl acetate                                                 | 23.65    | 0.39         | -            | 0.27         | -           | 0.27         | 0.91         | -    | -           | -           | -    | -    | 0.21        |
| Trans-pinocaryyl acetate                                           | 23.81    | -            | -            | -            | -           | -            | -            | -    | 0.26        | 0.27        | -    | -    | -           |
| 3-thujanol acetate / Cis-alpha-necrodol acetate                    | 24.22    | -            | -            | -            | -           | 0.25         | -            | -    | -           | -           | -    | -    | -           |
| <b>Grandisol</b>                                                   | 25.14    | <b>8.78</b>  | <b>17.64</b> | <b>36.18</b> | -           | <b>31.08</b> | <b>26.18</b> | -    | -           | -           | -    | -    | -           |
| Alpha-cubebene                                                     | 25.77    | -            | -            | -            | -           | -            | -            | -    | -           | -           | -    | -    | -           |
| Beta-elemene                                                       | 26.08    | -            | -            | -            | 0.38        | -            | -            | -    | -           | -           | -    | -    | -           |
| <b>Piperitenone / Citronellyl acetate</b>                          | 26.35    | <b>5.74</b>  | <b>4.59</b>  | <b>4.43</b>  | -           | <b>4.75</b>  | <b>3.2</b>   | -    | -           | -           | -    | -    | <b>6.60</b> |
| <b>Beta-caryophyllene</b>                                          | 26.64    | 0.53         | 0.74         | -            | <b>1.27</b> | 0.98         | 0.48         | -    | 0.34        | 0.27        | -    | -    | 0.42        |
| Linalool isovalerate                                               | 26.96    | 0.82         | 0.85         | 2.64         | -           | 2.37         | 0.85         | -    | -           | -           | -    | -    | -           |
| 2-phenyl-ethyl butanoate                                           | 26.97    | -            | -            | -            | 0.44        | -            | -            | -    | -           | -           | -    | -    | -           |
| Cis-beta-farnesene                                                 | 27.20    | -            | -            | -            | 0.35        | -            | -            | -    | -           | -           | -    | -    | -           |
| Gamma-curcumene                                                    | 27.64    | 0.38         | 0.74         | 0.81         | -           | 0.64         | 0.55         | -    | 0.39        | 0.36        | -    | -    | -           |
| <b>Curcumene ar / Germacrene D</b>                                 | 27.73    | <b>1.04</b>  | 0.96         | 0.74         | -           | 0.53         | 0.24         | -    | -           | -           | -    | -    | -           |
| Germacrene D                                                       | 27.78    | -            | -            | -            | 1.06        | -            | -            | -    | 0.75        | 0.76        | -    | -    | 0.54        |
| <b>Davana ether isomer</b>                                         | 27.81    | -            | -            | -            | -           | -            | -            | -    | <b>1.14</b> | <b>1.73</b> | -    | -    | -           |
| Beta-selinene                                                      | 27.87    | -            | -            | -            | 0.11        | -            | -            | -    | -           | -           | -    | -    | -           |
| Bicyclogermacrene                                                  | 28.03    | -            | -            | -            | -           | -            | -            | -    | 0.26        | -           | -    | -    | -           |
| Germacrene A                                                       | 28.03    | -            | -            | -            | 0.38        | -            | -            | -    | -           | -           | -    | -    | -           |
| Delta-cadinene                                                     | 28.39    | -            | -            | -            | 0.48        | -            | -            | -    | -           | -           | -    | -    | -           |
| Cis-3-hexenyl benzoate                                             | 29.04    | -            | -            | -            | 0.50        | -            | -            | -    | -           | -           | -    | -    | -           |
| Trans-2-hexenyl benzoate                                           | 29.21    | -            | -            | -            | 0.43        | -            | -            | -    | -           | -           | -    | -    | -           |
| Caryophyllene oxide                                                | 29.36    | -            | -            | -            | -           | -            | -            | -    | -           | -           | -    | -    | -           |
| Davanone B                                                         | 29.54    | -            | -            | -            | -           | -            | -            | -    | 0.43        | 0.41        | -    | -    | -           |
| Davanone                                                           | 29.61    | -            | -            | -            | -           | -            | -            | -    | 0.65        | 0.62        | -    | -    | -           |
| Beta-oplophenone                                                   | 29.68    | -            | -            | -            | 0.36        | -            | -            | -    | -           | -           | -    | -    | -           |
| Davanol D1 isomer                                                  | 29.95    | -            | -            | -            | -           | -            | -            | -    | 0.77        | 0.61        | -    | -    | -           |
| Davanol D2 isomer                                                  | 30.48    | -            | -            | -            | -           | -            | -            | -    | 0.27        | 0.26        | -    | -    | -           |
| Anthracene-1,2,3,4,5,6,7,8-octahydro-9,10-dimethyl                 | 32.04    | -            | -            | -            | 0.96        | -            | -            | -    | -           | -           | -    | -    | -           |

|                                                           |       |   |   |   |   |      |   |   |   |   |   |   |   |
|-----------------------------------------------------------|-------|---|---|---|---|------|---|---|---|---|---|---|---|
| Pyran-5-one(2,2-dimethyl-7-isobutyl-2H,5H-pyrano(4,3-b)-) | 32.95 | - | - | - | - | 0.28 | - | - | - | - | - | - | - |
|-----------------------------------------------------------|-------|---|---|---|---|------|---|---|---|---|---|---|---|

**Table S2.** Mean (using n = 3) content (%) of constituents in essential oil obtained by steam distillation of *A. tridentata* Nutt. var. *tridentata* accessions biomass collected from Bighorn Mountains in Wyoming.

| Constituent             | RT (mins) | Accessions   |              |
|-------------------------|-----------|--------------|--------------|
|                         |           | #221         | #222         |
| <b>Santolina triene</b> | 8.95      | <b>1.68</b>  | -            |
| Tricyclene              | 9.50      | 0.51         | 1.02         |
| <b>Alpha-pinene</b>     | 10.02     | <b>3.23</b>  | <b>4.32</b>  |
| <b>Camphene</b>         | 10.68     | <b>10.48</b> | <b>21.54</b> |
| Sabinene                | 11.56     | 0.40         | 0.62         |
| <b>Arthole</b>          | 11.70     | <b>3.84</b>  | -            |
| <b>Beta-pinene</b>      | 11.73     | -            | <b>2.21</b>  |
| Dehydro-1,8-cineole     | 12.22     | 0.30         | 0.25         |
| Alpha-terpinene         | 13.25     | 0.19         | 0.33         |
| Para-cymene             | 13.58     | 0.38         | 0.25         |
| Limonene                | 13.71     | -            | 0.37         |
| <b>Eucalyptol</b>       | 13.99     | <b>13.62</b> | <b>21.18</b> |
| Cis-arbusculone         | 14.64     | 0.25         | -            |
| Gamma-terpinene         | 14.92     | 0.53         | 0.67         |
| Artemisia ketone        | 14.99     | 0.52         | -            |
| Cis-sabinene hydrate    | 15.25     | 0.39         | 0.26         |
| Cis-thujone             | 16.77     | 0.77         | -            |
| <b>Chrysanthenone</b>   | 17.53     | <b>11.27</b> | <b>1.11</b>  |
| Trans-pinocarveol       | 17.70     | -            | 0.18         |
| <b>Camphor</b>          | 18.57     | <b>43.15</b> | <b>41.33</b> |
| Chrysanthemyl alcohol   | 18.89     | 0.33         | -            |
| <b>Pinocarvone</b>      | 19.04     | <b>1.13</b>  | 0.97         |
| <b>Borneol</b>          | 19.16     | <b>1.97</b>  | 0.93         |
| 4-terpineol             | 19.53     | 0.81         | 0.92         |
| Alpha-terpineol         | 19.97     | 0.23         | -            |
| Myrtenal / Myrtenol     | 20.21     | 0.59         | 0.78         |
| Bornyl acetate          | 23.38     | 0.47         | -            |
| Beta -caryophyllene     | 26.69     | 0.54         | 0.38         |
| Gamma-curcumene         | 27.64     | 0.37         | -            |
| Germacrene D            | 27.77     | 0.33         | -            |

**Table S3.** Mean (using n = 3) content (%) of constituents in essential oil obtained by steam distillation *A. tridentata* Nutt. var. *wyomingensis* (Beetle & Young) Welsh accessions biomass collected from Bighorn Mountains in Wyoming.

| Constituent                    | RT (mins) | Accession    | Range              |
|--------------------------------|-----------|--------------|--------------------|
|                                |           | #223         |                    |
| 2-acetylfuran                  | 8.71      | 3.23         | 0.48-3.23          |
| <b>Santolina triene</b>        | 8.96      | <b>6.02</b>  | <b>4.53-6.02</b>   |
| Tricyclene                     | 9.50      | 3.39         | 0.33-3.39          |
| <b>Alpha-pinene</b>            | 9.97      | <b>4.04</b>  | <b>1.06-4.04</b>   |
| <b>Camphene</b>                | 10.63     | <b>7.98</b>  | <b>6.64-7.98</b>   |
| 5,5-dimethylfuran-2-one        | 10.77     | 3.93         | 0.50-3.93          |
| <b>Arthole</b>                 | 11.82     | <b>17.36</b> | <b>17.36-20.15</b> |
| Yomogi alcohol                 | 12.62     | 4.50         | 0.44-4.50          |
| Para-cymene                    | 13.59     | 4.98         | 0.68-4.98          |
| <b>Eucalyptol</b>              | 13.97     | <b>12.99</b> | <b>12.41-12.99</b> |
| <b>Cis-arbusculone</b>         | 14.67     | <b>5.58</b>  | <b>1.01-5.58</b>   |
| Gamma-terpinene                | 14.93     | 5.43         | 0.67-5.43          |
| <b>Trans-arbusculone</b>       | 15.51     | <b>8.55</b>  | <b>5.06-8.55</b>   |
| <b>Chrysanthenone</b>          | 17.23     | <b>6.42</b>  | <b>1.01-6.42</b>   |
| <b>Alpha-santoline alcohol</b> | 18.34     | <b>14.81</b> | <b>13.01-14.81</b> |
| <b>Camphor</b>                 | 18.43     | <b>20.55</b> | <b>20.55-21.67</b> |
| <b>Chrysanthemyl alcohol</b>   | 18.89     | <b>7.05</b>  | <b>1.13-7.05</b>   |
| <b>Borneol</b>                 | 19.16     | <b>7.19</b>  | <b>1.20-7.19</b>   |

**Table S4.** Mean (using n = 3) content (%) of constituents in essential oil obtained by steam distillation of *A. cana* Pursh var. *cana* accessions biomass collected from Bighorn Mountains in Wyoming.

| Constituent                    | RT (mins) | Accessions   |              |
|--------------------------------|-----------|--------------|--------------|
|                                |           | #219         | #220         |
| <b>Santolina triene</b>        | 8.96      | <b>3.54</b>  | <b>3.69</b>  |
| Tricyclene                     | 9.50      | 0.41         | 0.39         |
| <b>Alpha-pinene</b>            | 10.01     | <b>2.72</b>  | <b>3.18</b>  |
| <b>Camphene</b>                | 10.64     | <b>7.37</b>  | <b>6.55</b>  |
| <b>Arthole</b>                 | 11.76     | <b>9.03</b>  | <b>6.24</b>  |
| Dehydro-1,8-cineole            | 12.23     | 0.17         | 0.21         |
| Yomogi alcohol                 | 12.75     | -            | 0.18         |
| Alpha-terpinene                | 13.27     | 0.33         | 0.48         |
| Para-cymene                    | 13.61     | 0.63         | 0.72         |
| Limonene                       | 13.66     | 0.27         | 0.85         |
| <b>Eucalyptol</b>              | 14.11     | <b>15.26</b> | <b>20.53</b> |
| Santonia epoxide               | 14.73     | 0.67         | 0.62         |
| <b>Gamma-terpinene</b>         | 14.97     | <b>1.77</b>  | <b>1.66</b>  |
| Cis-sabinene hydrate           | 15.26     | 0.35         | 0.40         |
| Artemisia alcohol              | 15.90     | 0.20         | 0.20         |
| Terpinolene                    | 16.08     | -            | 0.22         |
| Trans-sabinene hydrate         | 16.57     | 0.19         | 0.24         |
| Chrysanthenone                 | 17.28     | 0.37         | -            |
| Alpha-campholenal              | 17.59     | 0.31         | 0.50         |
| <b>Alpha-santoline alcohol</b> | 18.34     | <b>11.33</b> | <b>4.78</b>  |

|                       |       |              |              |
|-----------------------|-------|--------------|--------------|
| <b>Camphor</b>        | 18.48 | <b>35.25</b> | <b>40.59</b> |
| Chrysanthemyl alcohol | 18.95 | 0.76         | 0.60         |
| Pinocarvone           | 19.00 | 0.64         | 0.60         |
| <b>Borneol</b>        | 19.18 | <b>2.34</b>  | <b>2.64</b>  |
| <b>4-terpineol</b>    | 19.58 | <b>1.47</b>  | <b>2.13</b>  |
| Alpha-terpineol       | 20.02 | 0.44         | 0.86         |
| Myrtenal / Myrtenol   | 20.21 | 0.55         | 0.45         |
| Bornyl acetate        | 23.39 | 0.45         | 0.45         |

**Table S5.** Mean (using n = 3) content (%) of constituents in essential oil obtained by steam distillation of *A. longifolia* Nutt. accessions biomass collected from Bighorn Mountains in Wyoming.

| Constituent                    | RT (mins) | Accessions   |              |              |
|--------------------------------|-----------|--------------|--------------|--------------|
|                                |           | #216         | #217         | #218         |
| <b>Santolina triene</b>        | 8.96      | <b>2.66</b>  | <b>6.79</b>  | <b>3.10</b>  |
| Tricyclene                     | 9.50      | 0.34         | 0.36         | 0.37         |
| <b>Alpha-pinene</b>            | 10.01     | <b>2.78</b>  | <b>2.82</b>  | <b>3.23</b>  |
| <b>Camphene</b>                | 10.64     | <b>5.82</b>  | <b>7.01</b>  | <b>6.86</b>  |
| <b>Arthole</b>                 | 11.76     | <b>9.7</b>   | <b>6.76</b>  | <b>3.22</b>  |
| Dehydro-1,8-cineole            | 12.23     | 0.24         | 0.36         | 0.33         |
| Yomogi alcohol                 | 12.75     | 0.25         | 0.19         | -            |
| Alpha-terpinene                | 13.27     | 0.58         | 0.32         | 0.47         |
| Para-cymene                    | 13.61     | 0.35         | 0.92         | 0.52         |
| <b>Limonene</b>                | 13.66     | 0.51         | <b>1.33</b>  | 0.80         |
| <b>Eucalyptol</b>              | 14.11     | <b>30.79</b> | <b>24.57</b> | <b>25.48</b> |
| <b>Santonia epoxide</b>        | 14.73     | 0.65         | <b>1.22</b>  | 0.38         |
| <b>Gamma-terpinene</b>         | 14.97     | <b>1.54</b>  | <b>2.55</b>  | <b>1.49</b>  |
| Cis-sabinene hydrate           | 15.26     | 0.18         | 0.28         | 0.60         |
| Artemisia alcohol              | 15.90     | 0.22         | 0.17         | 0.14         |
| Terpinolene                    | 16.08     | 0.25         | -            | 0.22         |
| Trans-sabinene hydrate         | 16.57     | 0.22         | 0.33         | -            |
| Chrysanthenone                 | 17.28     | 0.42         | 0.25         | -            |
| Alpha-campholenal              | 17.59     | 0.46         | 0.43         | 0.37         |
| <b>Alpha-santoline alcohol</b> | 18.34     | <b>7.60</b>  | <b>6.05</b>  | -            |
| <b>Camphor</b>                 | 18.48     | <b>24.18</b> | <b>27.67</b> | <b>43.36</b> |
| <b>Chrysanthemyl alcohol</b>   | 18.95     | <b>1.03</b>  | 0.40         | 0.26         |
| Pinocarvone                    | 19.00     | 0.43         | 0.33         | 0.89         |
| <b>Borneol</b>                 | 19.18     | <b>2.29</b>  | <b>2.42</b>  | <b>2.44</b>  |
| <b>4-terpineol</b>             | 19.58     | <b>2.55</b>  | <b>1.72</b>  | <b>2.17</b>  |
| Alpha-terpineol                | 20.02     | 0.96         | 0.80         | 0.75         |
| Myrtenal / Myrtenol            | 20.21     | 0.52         | 0.46         | 0.51         |
| Bornyl acetate                 | 23.39     | 0.42         | 0.64         | 0.39         |
| Germacrene D                   | 27.76     | -            | 0.33         | -            |
| Davana ether isomer            | 28.12     | -            | 0.33         | -            |

**Table S6.** Mean (using n = 3) content (%) of constituents in essential oil obtained by steam distillation of *A. ludoviciana* Nutt. *ssp. ludoviciana* accession biomass collected from Bighorn Mountains in Wyoming.

| Constituent                        | RT (mins) | Accession<br>#213 |
|------------------------------------|-----------|-------------------|
| <b>Santolina triene</b>            | 8.96      | <b>2.16</b>       |
| Tricyclene                         | 9.51      | 0.68              |
| <b>Alpha-pinene</b>                | 10.07     | <b>1.89</b>       |
| <b>Camphene</b>                    | 10.72     | <b>13.3</b>       |
| Sabinene                           | 11.56     | 0.57              |
| <b>Beta-pinene</b>                 | 11.71     | <b>1.43</b>       |
| 1-octen-3-ol                       | 11.83     | 0.15              |
| Dehydro-1,8-cineole                | 12.21     | 0.20              |
| Alpha-terpinene                    | 13.26     | 0.42              |
| Para-cymene                        | 13.68     | 0.71              |
| <b>Eucalyptol</b>                  | 14.04     | <b>17.93</b>      |
| Gamma-terpinene                    | 14.94     | 0.81              |
| <b>Artemisia ketone</b>            | 15.02     | <b>1.27</b>       |
| Cis-sabinene hydrate               | 15.28     | 0.80              |
| Atemisia alcohol                   | 15.88     | 0.23              |
| Terpinolene                        | 16.07     | 0.19              |
| Trans-sabinene hydrate             | 16.51     | 0.47              |
| Linalool                           | 16.63     | 0.19              |
| Chrysanthenone / Alpha-campholenal | 17.54     | 0.28              |
| <b>Camphor</b>                     | 18.60     | <b>46.18</b>      |
| Pinocarvone                        | 19.02     | 0.45              |
| Cis-chrysanthemol                  | 19.10     | 0.71              |
| <b>Borneol</b>                     | 19.24     | <b>4.55</b>       |
| <b>4-terpineol</b>                 | 19.57     | <b>1.29</b>       |
| Alpha-terpineol                    | 19.99     | 0.44              |
| Myrtenal                           | 20.21     | 0.50              |
| Verbenone                          | 20.66     | 0.21              |
| Cis-carveol                        | 21.36     | 0.23              |
| Bornyl acetate                     | 23.38     | 0.29              |
| Artedouglasia oxide C              | 28.37     | 0.38              |
| Artedouglasia oxide A              | 28.55     | 0.49              |
| Artedouglasia oxide D              | 29.22     | 0.25              |
| Artedouglasia oxide B              | 30.08     | 0.19              |



**Table S7.** Mean (using n = 3) content (%) of constituents in essential oil obtained by hydrodistillation of *A. tridentata* var. *vaseyana* accessions biomass (leaves) collected from Bighorn Mountains in Wyoming.

| Constituent (in essential oil obtained from leaves) | RT (mins) | Accessions   |              |              |
|-----------------------------------------------------|-----------|--------------|--------------|--------------|
|                                                     |           | #259         | #261         | #262         |
| <b>Santolina triene</b>                             | 6.67      | <b>6.08</b>  | <b>2.18</b>  | -            |
| Tricyclene                                          | 7.10      | -            | 0.46         | -            |
| Alpha-pinene                                        | 7.53      | 0.42         | 2.27         | -            |
| <b>Camphene</b>                                     | 8.06      | <b>3.30</b>  | <b>12.27</b> | -            |
| <b>Beta-pinene</b>                                  | 9.08      | -            | <b>1.07</b>  | -            |
| <b>Atemiseole</b>                                   | 9.13      | -            | <b>13.82</b> | -            |
| <b>Artemiseole</b>                                  | 9.26      | <b>42.75</b> | -            | -            |
| Yomogi alcohol                                      | 10.02     | 0.57         | 0.18         | 0.35         |
| Ortho-cymene / Para-cymene                          | 10.85     | -            | 0.54         | -            |
| <b>Eucalyptol</b>                                   | 11.11     | -            | <b>6.77</b>  | -            |
| <b>4,8-dimethyl-trans-nona-1,3,7-triene</b>         | 11.15     | <b>1.23</b>  | -            | -            |
| Santolina alcohol                                   | 11.17     | 0.26         | 0.36         | -            |
| Santolina epoxide                                   | 11.81     | 0.11         | -            | -            |
| <b>Unknown 1</b>                                    | 13.96     | <b>4.12</b>  | -            | -            |
| <b>Chrysanthenone</b>                               | 14.14     | -            | <b>1.52</b>  | -            |
| <b>Alpa-santoline alcohol</b>                       | 14.70     | <b>3.34</b>  | -            | -            |
| <b>Camphor</b>                                      | 14.79     | <b>15.54</b> | -            | -            |
| <b>Unknown 2</b>                                    | 14.89     | <b>3.23</b>  | -            | -            |
| <b>Camphor</b>                                      | 14.95     | -            | <b>53.62</b> | -            |
| Borneol                                             | 15.33     | -            | 0.93         | -            |
| <b>Trans-chrysanthemol</b>                          | 15.34     | -            | -            | <b>3.27</b>  |
| <b>Pinocarvone</b>                                  | 15.73     | -            | <b>1.46</b>  | -            |
| <b>Unknown 3</b>                                    | 15.78     | <b>2.37</b>  | -            | -            |
| <b>4-terpineol</b>                                  | 15.82     | -            | <b>1.57</b>  | -            |
| Myrtenol / Myrtenal                                 | 16.33     | -            | 0.78         | -            |
| <b>Fragranol</b>                                    | 17.16     | -            | -            | <b>25.5</b>  |
| <b>Unknown 4</b>                                    | 17.82     | <b>1.50</b>  | -            | -            |
| <b>Unknown 5</b>                                    | 18.07     | <b>1.45</b>  | -            | -            |
| <b>Unknown 6</b>                                    | 18.17     | <b>2.20</b>  | -            | -            |
| Bornyl acetate                                      | 18.89     | -            | 0.60         | -            |
| <b>Trans-alpha-necrodol acetate</b>                 | 18.89     | -            | -            | <b>9.99</b>  |
| <b>Cyclooctadiene</b>                               | 20.47     | -            | -            | <b>38.32</b> |
| <b>Unknown 7</b>                                    | 21.61     | -            | -            | <b>9.22</b>  |
| <b>Unknown 8</b>                                    | 21.82     | -            | -            | <b>3.67</b>  |
| <b>Intermedeol</b>                                  | 25.32     | <b>2.73</b>  | -            | -            |
| <b>Unknown 9</b>                                    | 27.88     | -            | -            | <b>4.96</b>  |
| <b>Unknown 10</b>                                   | 27.89     | <b>5.05</b>  | -            | -            |
| <b>Unknown 11</b>                                   | 28.32     | -            | -            | <b>3.64</b>  |
| <b>Unknown 12</b>                                   | 28.33     | <b>4.74</b>  | -            | -            |
| Chrysanthenone/Alpha-campholenal                    | -         | -            | 0.58         | -            |

**Table S8.** Mean (using n = 3) content (%) of constituents in essential oil obtained by hydrodistillation of *A. tri-dentata* var. *wyomingensis* accessions biomass (leaves or inflorescences) collected from Bighorn Mountains in Wyoming.

| Constituents (in essential oil obtained from leaves)                | RT (mins) | Accessions   |              |
|---------------------------------------------------------------------|-----------|--------------|--------------|
|                                                                     |           | #251         | #260         |
| Cis-salveve                                                         | 4.73      | -            | 0.31         |
| <b>Santolina triene</b>                                             | 6.68      | <b>9.64</b>  | -            |
| Alpha-pinene                                                        | 7.53      | 0.54         | 0.24         |
| <b>Camphene</b>                                                     | 8.06      | <b>2.39</b>  | <b>2.82</b>  |
| 5,5-dimethyl-2(5H)-furanone                                         | 8.23      | 0.22         | -            |
| Sabinene                                                            | 8.98      | -            | 0.35         |
| Artemiseole / Beta-pinene                                           | 9.11      | -            | 0.20         |
| <b>Artemiseole</b>                                                  | 9.24      | <b>32.59</b> | -            |
| Yomogi alcohol                                                      | 10.06     | 0.71         | -            |
| Ortho-cymene / Para-cymene                                          | 10.79     | -            | 0.33         |
| Para-cymene                                                         | 10.82     | 0.82         | -            |
| <b>Eucalyptol</b>                                                   | 10.99     | <b>10.75</b> | <b>1.53</b>  |
| <b>4,8-dimethyl-trans-nona-1,3,7-triene</b>                         | 11.19     | <b>2.33</b>  | -            |
| Santolina alcohol                                                   | 11.27     | 0.37         | -            |
| Santolina epoxide                                                   | 11.83     | 0.24         | -            |
| <b>Unknown 1 isomer A</b>                                           | 12.07     | <b>1.79</b>  | -            |
| <b>Unknown 1 isomer B</b>                                           | 12.49     | <b>3.40</b>  | -            |
| <b>Unknown 2 isomer A</b>                                           | 12.61     | <b>1.36</b>  | -            |
| <b>Unknown 2 isomer B</b>                                           | 12.69     | <b>1.24</b>  | -            |
| <b>Cis-thujone</b>                                                  | 13.84     | -            | <b>71.00</b> |
| <b>Trans-thujone</b>                                                | 14.09     | -            | <b>4.54</b>  |
| <b>Methyl -santolate</b>                                            | 14.76     | <b>8.64</b>  | -            |
| <b>Camphor</b>                                                      | 14.84     | <b>11.03</b> | <b>17.17</b> |
| Borneol                                                             | 15.31     | 0.94         | 0.58         |
| Pinocarvone                                                         | 15.69     | -            | 0.52         |
| <b>4-terpineol</b>                                                  | 15.77     | <b>1.24</b>  | 0.77         |
| Unknown 3                                                           | 17.54     | 0.36         | -            |
| <b>Unknown 4 isomer A</b>                                           | 17.83     | <b>1.65</b>  | -            |
| <b>Unknown 4 isomer B</b>                                           | 18.08     | <b>1.26</b>  | -            |
| <b>Unknown 5</b>                                                    | 18.58     | <b>1.34</b>  | -            |
| <b>Constituents (in essential oil obtained from inflorescences)</b> |           |              |              |
| <b>Santolina triene</b>                                             | 6.68      | <b>7.29</b>  | -            |
| Tricyclene                                                          | 7.10      | 0.09         | -            |
| Alpha-pinene                                                        | 7.54      | 0.55         | -            |
| <b>Camphene</b>                                                     | 8.08      | <b>3.24</b>  | -            |
| 5,5-dimethyl-2(5H)-furanone                                         | 8.23      | 0.22         | -            |
| <b>Artemiseole</b>                                                  | 9.24      | <b>26.34</b> | -            |
| Yomogi alcohol                                                      | 10.06     | 0.68         | -            |
| Para-cymene                                                         | 10.82     | 0.74         | -            |
| <b>Eucalyptol</b>                                                   | 11.08     | <b>14.01</b> | -            |
| <b>4,8-dimethyl-trans-nona-1,3,7-triene</b>                         | 11.19     | <b>2.47</b>  | -            |
| Santolina alcohol                                                   | 11.27     | 0.28         | -            |
| Santolina epoxide                                                   | 11.83     | 0.26         | -            |
| Gamma-terpinene                                                     | 11.98     | 0.26         | -            |
| <b>Unknown 1 isomer A</b>                                           | 12.07     | <b>2.92</b>  | -            |
| <b>Unknown 1 isomer B</b>                                           | 12.49     | <b>5.89</b>  | -            |

|                            |       |              |   |
|----------------------------|-------|--------------|---|
| Unknown 2 isomer A         | 12.61 | 0.80         | - |
| Unknown 2 isomer B         | 12.69 | 0.90         | - |
| Chrysanthenone             | 14.13 | 0.33         | - |
| <b>Methyl -santolinate</b> | 14.76 | <b>10.13</b> | - |
| <b>Camphor</b>             | 14.85 | <b>13.70</b> | - |
| Borneol                    | 15.31 | 0.78         | - |
| <b>4-terpineol</b>         | 15.79 | <b>1.59</b>  | - |
| <b>Unknown 3</b>           | 16.52 | <b>1.20</b>  | - |
| Unknown 4                  | 17.54 | 0.81         | - |
| <b>Unknown 5 isomer A</b>  | 17.83 | <b>1.27</b>  | - |
| Unknown 5 isomer B         | 18.08 | 0.33         | - |
| Unknown 6                  | 18.58 | 0.93         | - |

**Table S9.** Mean (using n = 3) content (%) of constituents in essential oil obtained by hydrodistillation of *A. cana* var. *cana* accessions biomass (leaves or inflorescences) collected from Bighorn Mountains in Wyoming.

| Constituents (in essential oil obtained from leaves)                | RT (mins) | Accessions   |              |              |              |              |              |              |
|---------------------------------------------------------------------|-----------|--------------|--------------|--------------|--------------|--------------|--------------|--------------|
|                                                                     |           | #252         | #253         | #254         | #255         | #256         | #257         | #258         |
| Santolina triene                                                    | 6.67      | <b>2.20</b>  | 0.48         | -            | <b>1.61</b>  | <b>2.76</b>  | <b>4.65</b>  | -            |
| Tricyclene                                                          | 7.10      | 0.35         | <b>2.95</b>  | 0.39         | 0.28         | 0.32         | 0.35         | 0.43         |
| Alpha-pinene                                                        | 7.55      | <b>2.07</b>  | -            | <b>2.48</b>  | <b>2.47</b>  | <b>3.12</b>  | <b>2.28</b>  | <b>3.30</b>  |
| Camphene                                                            | 8.10      | <b>7.48</b>  | 0.92         | <b>7.66</b>  | <b>6.92</b>  | <b>6.74</b>  | <b>5.48</b>  | <b>11.34</b> |
| Sabinene                                                            | 8.98      | -            | <b>16.23</b> | 0.18         | -            | -            | -            | -            |
| Beta-pinene                                                         | 9.08      | <b>1.32</b>  | -            | <b>2.00</b>  | <b>1.35</b>  | <b>1.83</b>  | <b>1.23</b>  | <b>2.07</b>  |
| Atemiseole                                                          | 9.13      | <b>5.39</b>  | <b>1.30</b>  | -            | <b>4.19</b>  | <b>3.97</b>  | <b>9.83</b>  | -            |
| Yomogi alcohol                                                      | 10.07     | 0.32         | <b>5.05</b>  | -            | 0.23         | 0.56         | 0.42         | -            |
| Alpha-phellandrene                                                  | 10.08     | -            | <b>17.11</b> | 0.39         | -            | -            | -            | -            |
| Alpha-terpinene                                                     | 10.51     | -            | -            | 0.31         | -            | 0.22         | -            | 0.29         |
| Ortho-cymene / Para-cymene                                          | 10.85     | <b>2.16</b>  | <b>31.20</b> | <b>4.85</b>  | <b>2.00</b>  | <b>2.77</b>  | <b>2.44</b>  | <b>4.04</b>  |
| Eucalyptol                                                          | 11.11     | <b>30.47</b> | 0.63         | <b>20.64</b> | <b>25.37</b> | <b>22.26</b> | <b>25.45</b> | <b>24.32</b> |
| Santolina alcohol                                                   | 11.17     | 0.32         | <b>9.03</b>  | -            | -            | 0.20         | 0.66         | -            |
| Trans-ocimene                                                       | 11.65     | -            | <b>2.48</b>  | -            | -            | -            | -            | -            |
| Santolina epoxide                                                   | 11.82     | 0.42         | 0.18         | -            | 0.21         | 0.44         | 0.42         | -            |
| Prenyl isobutanoate                                                 | 11.92     | -            | 0.33         | -            | -            | -            | -            | -            |
| Gamma-terpinene                                                     | 11.98     | 0.50         | <b>5.83</b>  | 0.68         | 0.33         | 0.64         | 0.35         | 0.67         |
| Alpha-campholenal                                                   | 13.96     | -            | 0.23         | -            | 0.30         | -            | -            | 0.65         |
| Chrysanthenone                                                      | 14.14     | -            | -            | 0.47         | -            | -            | -            | -            |
| Camphor                                                             | 14.95     | <b>40.57</b> | -            | <b>48.55</b> | <b>47.64</b> | <b>45.16</b> | <b>37.16</b> | <b>42.95</b> |
| Borneol                                                             | 15.33     | 1.32         | -            | <b>1.59</b>  | 0.98         | <b>1.01</b>  | <b>1.19</b>  | <b>1.50</b>  |
| Pinocarvone                                                         | 15.73     | -            | -            | <b>2.04</b>  | 0.60         | <b>2.09</b>  | <b>2.33</b>  | <b>1.67</b>  |
| 4-terpineol                                                         | 15.82     | 3.22         | -            | <b>2.63</b>  | <b>2.89</b>  | <b>3.25</b>  | <b>3.30</b>  | <b>3.09</b>  |
| Alpha-terpineol                                                     | 16.22     | -            | -            | 0.79         | 0.76         | 0.99         | 0.92         | -            |
| Myrtenol / Myrtenal                                                 | 16.33     | 0.76         | -            | 0.85         | -            | 0.66         | -            | 0.77         |
| Bornyl acetate                                                      | 18.89     | -            | 0.68         | <b>2.18</b>  | 0.80         | 0.98         | 0.73         | <b>2.97</b>  |
| Alpha-terpinyl acetate                                              | 20.43     | -            | -            | -            | -            | -            | -            | -            |
| <b>Chrysanthenone/Alpha-campholenal</b>                             | -         | 0.67         | 0.35         | <b>1.53</b>  | 0.60         | -            | 0.63         | -            |
| <b>Constituents (in essential oil obtained from inflorescences)</b> |           |              |              |              |              |              |              |              |
| Santolina triene                                                    | 6.67      | <b>2.21</b>  | 0.41         | -            | <b>1.43</b>  | <b>3.10</b>  | <b>9.05</b>  | -            |
| Tricyclene                                                          | 7.10      | 0.39         | <b>2.56</b>  | 0.49         | 0.38         | 0.38         | 0.30         | 0.61         |
| Alpha-pinene                                                        | 7.55      | <b>1.71</b>  | -            | <b>3.03</b>  | <b>3.39</b>  | <b>3.04</b>  | <b>2.75</b>  | <b>5.37</b>  |

|                                  |       |              |              |              |              |              |              |              |
|----------------------------------|-------|--------------|--------------|--------------|--------------|--------------|--------------|--------------|
| Camphene                         | 8.10  | <b>8.46</b>  | 0.87         | <b>9.72</b>  | <b>8.17</b>  | <b>8.31</b>  | <b>6.19</b>  | <b>14.68</b> |
| Sabinene                         | 8.98  | -            | <b>15.84</b> | 0.18         | -            | 0.18         | -            | 0.24         |
| Beta-pinene                      | 9.08  | <b>1.02</b>  | -            | <b>2.13</b>  | <b>1.58</b>  | <b>1.63</b>  | <b>1.31</b>  | <b>2.88</b>  |
| Atemiseole                       | 9.13  | <b>7.53</b>  | <b>1.11</b>  | -            | <b>3.11</b>  | <b>4.14</b>  | <b>8.48</b>  | -            |
| Yomogi alcohol                   | 10.07 | 0.27         | <b>5.25</b>  | -            | 0.28         | 0.24         | 0.39         | -            |
| Alpha-phellandrene               | 10.08 | -            | <b>16.28</b> | 0.99         | -            | -            | -            | -            |
| Alpha-terpinene                  | 10.51 | -            | -            | 0.26         | -            | -            | -            | 0.25         |
| Ortho-cymene / Para-cymene       | 10.85 | <b>2.33</b>  | <b>28.39</b> | <b>6.35</b>  | <b>1.90</b>  | <b>3.32</b>  | <b>2.01</b>  | <b>4.57</b>  |
| Eucalyptol                       | 11.11 | <b>29.79</b> | -            | <b>21.67</b> | <b>23.56</b> | <b>21.4</b>  | <b>24.66</b> | <b>21.02</b> |
| Santolina alcohol                | 11.17 | 0.35         | <b>8.72</b>  | -            | -            | 0.27         | 0.57         | -            |
| Trans-ocimene                    | 11.65 | -            | <b>3.60</b>  | -            | -            | -            | -            | -            |
| Santolina epoxide                | 11.82 | 0.84         | 0.20         | -            | 0.47         | 0.24         | 0.73         | -            |
| Prenyl isobutanoate              | 11.92 | -            | 0.88         | -            | -            | -            | 0.16         | -            |
| Gamma-terpinene                  | 11.98 | <b>1.00</b>  | <b>10.90</b> | 0.77         | 0.53         | 0.52         | 0.88         | 0.89         |
| Alpha-campholenal                | 13.96 | -            | 0.25         | -            | -            | -            | -            | -            |
| Chrysanthenone                   | 14.14 | -            | <b>1.20</b>  | 0.42         | 0.26         | 0.36         | -            | -            |
| Camphor                          | 14.95 | <b>38.7</b>  | -            | <b>45.36</b> | <b>47.76</b> | <b>43.68</b> | <b>36.13</b> | <b>40.49</b> |
| Borneol                          | 15.33 | 1.18         | -            | <b>1.20</b>  | 0.89         | 0.94         | 0.74         | <b>1.09</b>  |
| Pinocarvone                      | 15.73 | 0.86         | -            | <b>1.19</b>  | -            | <b>1.35</b>  | <b>1.58</b>  | <b>1.57</b>  |
| 4-terpineol                      | 15.82 | 2.58         | -            | <b>2.13</b>  | <b>3.06</b>  | <b>2.84</b>  | <b>2.99</b>  | <b>2.54</b>  |
| Alpha-terpineol                  | 16.22 | -            | -            | 0.67         | 0.85         | 0.91         | 0.86         | -            |
| Myrtenol / Myrtenal              | 16.33 | 0.77         | -            | 0.62         | 0.59         | 0.67         | -            | 0.58         |
| Bornyl acetate                   | 18.89 | -            | 0.80         | <b>1.25</b>  | 0.79         | 0.85         | -            | <b>3.20</b>  |
| Alpha-terpinyl acetate           | 20.43 | -            | -            | -            | -            | <b>1.16</b>  | -            | -            |
| Chrysanthenone/Alpha-campholenal |       | -            | 0.38         | 0.87         | 0.64         | 0.59         | -            | -            |

**Table S10.** Mean (using n = 3) content (%) and range of EO obtained by hydrodistillation for accessions from Bighorn Mountains in Wyoming in the Fall of 2014.

| Species                                       | Accession | Leaves |             | Inflorescences |             |
|-----------------------------------------------|-----------|--------|-------------|----------------|-------------|
|                                               |           | Mean   | Range       | Mean           | Range       |
| <i>Artemisia</i> spp.                         | 250       | 0.79   | 0.69 - 0.90 | 1.08           | 1.00 - 1.14 |
| <i>A. tridentata</i> var. <i>wyomingensis</i> | 251       | 0.71   | 0.53 - 1.06 | 1.15           | 1.06 - 1.22 |
| <i>A. cana</i> var. <i>cana</i>               | 252       | 0.49   | 0.45 - 0.52 | 0.56           | 0.43 - 0.64 |
| <i>A. cana</i> var. <i>cana</i>               | 253       | 0.51   | 0.48 - 0.58 | 0.28           | 0.17 - 0.34 |
| <i>A. cana</i> var. <i>cana</i>               | 254       | 0.08   | 0.04 - 0.11 | 0.30           | 0.28 - 0.34 |
| <i>A. cana</i> var. <i>cana</i>               | 255       | 0.63   | 0.59 - 0.67 | 0.86           | 0.73 - 1.00 |
| <i>A. cana</i> var. <i>cana</i>               | 256       | 0.90   | 0.81 - 0.96 | 0.96           | 0.84 - 1.10 |
| <i>A. cana</i> var. <i>cana</i>               | 257       | 0.50   | 0.42 - 0.60 | 0.91           | 0.77 - 1.02 |
| <i>A. cana</i> var. <i>cana</i>               | 258       | 0.15   | 0.13 - 0.17 | 0.40           | 0.30 - 0.53 |
| <i>A. tridentata</i> var. <i>vaseyana</i>     | 259       | 0.16   | 0.12 - 0.18 | -              | -           |
| <i>A. tridentata</i> var. <i>wyomingensis</i> | 260       | 1.06   | 1.00 - 1.16 | -              | -           |
| <i>A. tridentata</i> var. <i>vaseyana</i>     | 261       | 0.31   | 0.24 - 0.36 | -              | -           |
| <i>A. tridentata</i> var. <i>vaseyana</i>     | 262       | 0.22   | 0.06 - 0.42 | -              | -           |

**Table S11.** Evaluation of select essential oils against *Leishmania donovani* and *Plasmodium falciparum* D6. Data is percent inhibition. Primary evaluations performed at 80 ug/mL for *L. donovani* and 15,867 ng/mL for *P. falciparum* D6.

| Species                                       | <i>L. donovani</i> | <i>P. falciparum</i> D6 |
|-----------------------------------------------|--------------------|-------------------------|
| <i>A. cana</i> var. <i>cana</i>               | 0                  | 0                       |
| <i>A. longifolia</i>                          | 0                  | 34                      |
| <i>A. tridentata</i> var. <i>tridentata</i>   | 3                  | 0                       |
| <i>A. tridentata</i> var. <i>vaseyana</i>     | 4                  | 16                      |
| <i>A. tridentata</i> var. <i>wyomingensis</i> | 13                 | 14                      |

**Table S12.** Evaluation of select essential oils against opportunistic infection pathogens. Primary evaluations performed at 50 ug/mL and data is percent inhibition.

| Species                                       | <i>Aspergillus fumigatus</i> | <i>Candida albicans</i> | <i>Candida glabrata</i> | <i>Candida krusei</i> | <i>Cryptococcus neoformans</i> | <i>E. coli</i> | <i>M. intracellulare</i> | MRS | <i>Pseudomonas aeruginosa</i> | <i>Staphylococcus aureus</i> |
|-----------------------------------------------|------------------------------|-------------------------|-------------------------|-----------------------|--------------------------------|----------------|--------------------------|-----|-------------------------------|------------------------------|
| <i>A. cana</i> var. <i>cana</i>               | 8                            | 0                       | 6                       | 1                     | 13                             | 2              | 0                        | 3   | 2                             | 4                            |
| <i>A. longifolia</i>                          | 9                            | 0                       | 5                       | 0                     | 9                              | 2              | 0                        | 1   | 0                             | 1                            |
| <i>A. tridentata</i> var. <i>tridentata</i>   | 11                           | 0                       | 6                       | 3                     | 18                             | 2              | 0                        | 3   | 4                             | 5                            |
| <i>A. tridentata</i> var. <i>vaseyana</i>     | 4                            | 0                       | 3                       | 2                     | 4                              | 0              | 4                        | 0   | 3                             | 0                            |
| <i>A. tridentata</i> var. <i>wyomingensis</i> | 12                           | 0                       | 5                       | 8                     | 21                             | 3              | 0                        | 0   | 6                             | 7                            |
